# Supplementary material for: Three-dimensional methane distribution simulated with FLEXPART 8-CTM-1.1 constrained with observation data
Source: Copernicus journal article supplement (doi:10.5194/gmd-11-4469-2018), 2018-11-08
Supplement: Supplementary file 1 [file gmd-11-4469-2018-supplement.pdf]

Supplement of Geosci. Model Dev., 11, 4469–4487, 2018  
<https://doi.org/10.5194/gmd-11-4469-2018-supplement>  
© Author(s) 2018. This work is distributed under  
the Creative Commons Attribution 4.0 License.

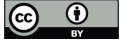

*Supplement of*

## **Three-dimensional methane distribution simulated with FLEXPART 8-CTM-1.1 constrained with observation data**

**Christine D. Groot Zwaaftink et al.**

*Correspondence to:* Christine D. Groot Zwaaftink (cgz@nilu.no)

The copyright of individual parts of the supplement might differ from the CC BY 4.0 License.

**Table S1 Names, coordinates and data providers of all sites that were included in this study as nudging or validation station.**

| Site ID | Site name          | Latitude<br>(°N) | Longitude<br>(°E) | Altitude<br>(m) | Contributor(s)        |
|---------|--------------------|------------------|-------------------|-----------------|-----------------------|
| ALT     | Alert              | 82.45            | -62.52            | 210             | CSIRO/ECCC/NOAA_ESRL  |
| AMY     | Anmyeon-do         | 36.53            | 126.32            | 47              | KMA                   |
| ARH     | Arrival Heights    | -77.80           | 166.67            | 184             | NIWA                  |
| ASC     | Ascension Island   | -7.92            | -14.42            | 54              | NOAA_ESRL             |
| ASK     | Assekrem           | 23.27            | 5.63              | 2710            | NOAA_ESRL             |
| AZR     | Terceira Island    | 38.77            | -27.37            | 40              | NOAA_ESRL             |
| BHD     | Baring Head        | -41.41           | 174.87            | 85              | NOAA_ESRL             |
| BIR     | Birkenes           | 58.39            | 8.25              | 219             | NILU                  |
| BKT     | Bukit Koto Tabang  | -0.20            | 100.32            | 864.5           | BMKG Empa/NOAA_ESRL   |
| BMW     | Tudor Hill         | 32.27            | -64.87            | 30              | NOAA_ESRL             |
| BRW     | Barrow             | 71.32            | -156.60           | 11              | NOAA_ESRL             |
| CBA     | Cold Bay           | 55.20            | -162.72           | 25              | NOAA_ESRL             |
| CFA     | Cape Ferguson      | -19.28           | 147.05            | 2               | CSIRO                 |
| CGO     | Cape Grim          | -40.68           | 144.68            | 94              | AGAGE/CSIRO/NOAA_ESRL |
| CHL     | Churchill          | 58.75            | -94.07            | 35              | ECCC                  |
| CHR     | Christmas Island   | 1.70             | -157.17           | 3               | NOAA_ESRL             |
| CMN     | Monte Cimone       | 44.18            | 10.70             | 2165            | UNIURB                |
| CPT     | Cape Point         | -34.35           | 18.48             | 230             | SAWS/NOAA_ESRL        |
| CRI     | Cape Rama          | 15.08            | 73.83             | 60              | CSIRO                 |
| CRZ     | Crozet             | -46.45           | 51.85             | 120             | NOAA_ESRL             |
| CYA     | Casey Station      | -66.28           | 110.53            | 60              | CSIRO                 |
| DEM     | Demyanskoe         | 59.79            | 70.87             | 75              | JR-STATION            |
| EGB     | Egbert             | 44.23            | -79.78            | 253             | ECCC                  |
| EIC     | Easter Island      | -27.13           | -109.45           | 50              | NOAA_ESRL             |
| ESP     | Estevan Point      | 49.38            | -126.55           | 39              | ECCC                  |
| ETL     | East Trout Lake    | 54.35            | -104.98           | 492             | ECCC                  |
| FSD     | Fraserdale         | 49.88            | -81.57            | 210             | ECCC                  |
| GLH     | Giordan Lighthouse | 36.07            | 14.22             | 160             | Univ. Malta           |
| GMI     | Guam               | 13.43            | 144.78            | 2               | NOAA_ESRL             |
| GPA     | Gunn Point         | -12.25           | 131.05            | 25              | CSIRO                 |
| HBA     | Halley Bay         | -75.57           | -26.50            | 33              | NOAA_ESRL             |
| HPB     | Hohenpeissenberg   | 47.80            | 11.02             | 985             | NOAA_ESRL             |
| HUN     | Hegyhatsal         | 46.95            | 16.65             | 248             | NOAA_ESRL             |
| ICE     | Heimaey            | 63.40            | -20.28            | 100             | NOAA_ESRL             |
| IGR     | Igrim              | 63.19            | 64.41             | 9               | JR-STATION            |
| IZO     | Izaña (Tenerife)   | 28.30            | -16.50            | 2367            | AEMET/NOAA_ESRL       |
| JFJ     | Jungfraujoeh       | 46.55            | 7.99              | 3580            | EMPA                  |
| KEY     | Key Biscayne       | 25.67            | -80.20            | 3               | NOAA_ESRL             |
| KRS     | Karasevoe          | 58.25            | 82.42             | 76              | JR-STATION            |
| KUM     | Cape Kumukahi      | 19.52            | -154.82           | 3               | NOAA_ESRL             |

|     |                                                               |        |         |         |                    |
|-----|---------------------------------------------------------------|--------|---------|---------|--------------------|
| LAU | Lauder                                                        | -45.03 | 169.67  | 370     | NIWA               |
| LEF | Park Falls                                                    | 45.92  | -90.27  | 868     | NOAA_ESRL          |
| LLB | Lac La Biche (Alberta)                                        | 54.95  | -112.45 | 540     | ECCC/NOAA_ESRL     |
| LLN | Lulin                                                         | 23.47  | 120.87  | 2867    | NOAA_ESRL          |
| LMP | Lampedusa                                                     | 35.52  | 12.63   | 45      | ENEA/NOAA_ESRL     |
| MAA | Mawson                                                        | -67.62 | 62.87   | 32      | CSIRO              |
| MEX | High Altitude Global<br>Climate Observation<br>Center, Mexico | 19.98  | -97.17  | 4560    | NOAA_ESRL          |
| MHD | Mace Head                                                     | 53.33  | -9.90   | 8       | AGAGE/NOAA_ESRL    |
| MID | Sand Island                                                   | 28.20  | -177.37 | 7.7     | NOAA_ESRL          |
| MLO | Mauna Loa                                                     | 19.54  | -155.58 | 3397    | CSIRO/NOAA_ESRL    |
| MNM | Minamitorishima                                               | 24.28  | 153.98  | 8       | JMA                |
| MQA | Macquarie Island                                              | -54.48 | 158.97  | 12      | CSIRO              |
| NAT | Natal                                                         | -6.00  | -35.20  | 0       | NOAA_ESRL          |
| NGL | Neuglobsow                                                    | 53.17  | 13.03   | 65      | UBA                |
| NMB | Gobabeb                                                       | -23.57 | 15.02   | 461     | NOAA_ESRL          |
| NOY | Noyabrsk                                                      | 63.43  | 75.78   | 108     | JR-STATION         |
| NWR | Niwot Ridge (T-van)                                           | 40.05  | -105.59 | 3523    | NOAA_ESRL          |
| OXK | Ochsenkopf                                                    | 50.03  | 11.80   | 1185    | NOAA_ESRL          |
| PAL | Pallas-Sammaltunturi                                          | 67.97  | 24.12   | 560     | NOAA_ESRL          |
| PRS | Plateau Rosa                                                  | 45.93  | 7.70    | 3480    | RSE S.p.A.         |
| PSA | Palmer Station                                                | -64.92 | -64.00  | 10      | NOAA_ESRL          |
| RGL | Ridge Hill                                                    | 52.00  | -2.54   | 204     | UNIVBRIS           |
| RPB | Ragged Point                                                  | 13.17  | -59.43  | 45      | AGAGE/NOAA_ESRL    |
| RYO | Ryori                                                         | 39.03  | 141.82  | 260     | JMA                |
| SDZ | Shangdianzi                                                   | 40.65  | 117.12  | 287     | CMA NOAA_ESRL      |
| SEY | Mahe Island                                                   | -4.67  | 55.17   | 7       | NOAA_ESRL          |
| SGP | Southern Great Plains                                         | 36.78  | -97.50  | 314     | NOAA_ESRL          |
| SHM | Shemya Island                                                 | 52.72  | 174.08  | 40      | NOAA_ESRL          |
| SMO | Tutuila (Cape Matatula)                                       | -14.24 | -170.57 | 42      | AGAGE/NOAA_ESRL    |
| SNB | Sonnblick                                                     | 47.05  | 12.95   | 3106    | UBA                |
| SPO | South Pole                                                    | -89.98 | -24.80  | 2810    | CSIRO/NOAA_ESRL    |
| SSL | Schauinsland                                                  | 47.92  | 7.92    | 1205    | UBA                |
| SUM | Summit                                                        | 72.58  | -38.48  | 3238    | INSTAAR/NOAA_ESRL  |
| SYO | Syowa Station                                                 | -69.00 | 39.58   | 16      | NOAA_ESRL          |
| TAC | Tacolneston Tall Tower                                        | 52.52  | 1.14    | 56      | UNIVBRIS/NOAA_ESRL |
| TAP | Tae-ahn Peninsula                                             | 36.72  | 126.12  | 20      | NOAA_ESRL          |
| THD | Trinidad Head                                                 | 41.05  | -124.15 | 120     | AGAGE/NOAA_ESRL    |
| TIK | Tiksi                                                         | 71.59  | 128.92  | 8       | NOAA_ESRL          |
| TLL | El Tololo                                                     | -30.17 | -70.80  | 2220    | DMC Empa           |
| TTA | Angus                                                         | 56.56  | -2.99   | 400+222 | UNIVBRIS           |
| USH | Ushuaia                                                       | -54.85 | -68.31  | 18      | NOAA_ESRL          |

|     |                                |       |         |      |               |
|-----|--------------------------------|-------|---------|------|---------------|
| UTA | Wendover                       | 39.88 | -113.72 | 1320 | NOAA_ESRL     |
| UUM | Ulaan Uul                      | 44.45 | 111.08  | 914  | NOAA_ESRL     |
| WIS | Sede Boker                     | 31.12 | 34.87   | 400  | NOAA_ESRL     |
| WLD | Westerland                     | 54.93 | 8.31    | 12+0 | UBA Germany   |
| WLG | Mt. Waliguan                   | 36.28 | 100.90  | 3810 | CMA NOAA_ESRL |
| WSA | Sable Island                   | 43.93 | -60.02  | 5    | ECCC          |
| YAK | Yakutsk                        | 62.09 | 129.36  | 264  | JR-STATION    |
| YON | Yonagunijima                   | 24.47 | 123.02  | 30   | JMA           |
| ZEP | Zeppelifjellet<br>(Ny-Ålesund) | 78.90 | 11.88   | 475  | NOAA_ESRL     |

---

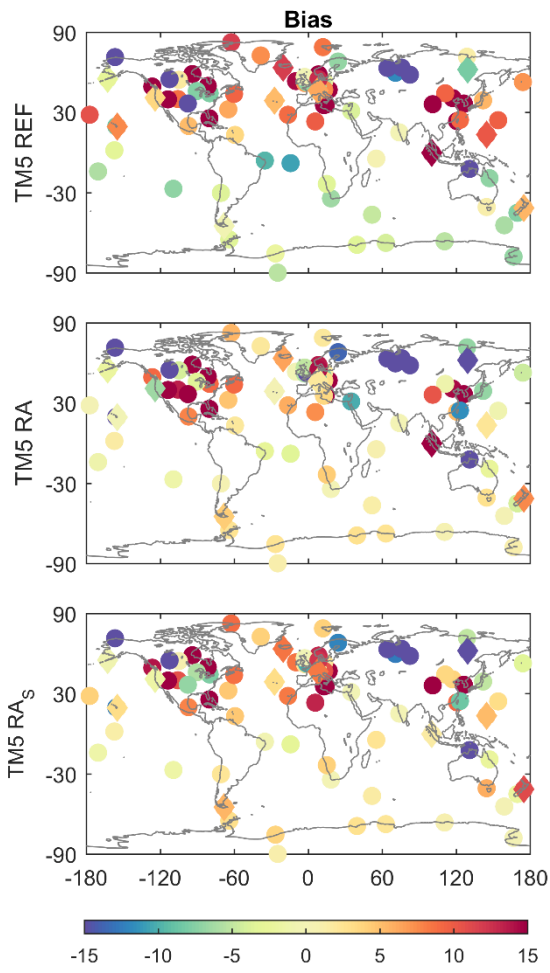

5 **Figure S1 Methane bias (ppb) at surface stations for different simulations of TM5, with a priori fluxes (REF), optimized fluxes based on NOAA surface observations (RA) and optimized fluxes based on NOAA surface observations and GOSAT satellite retrievals (RA<sub>S</sub>).**

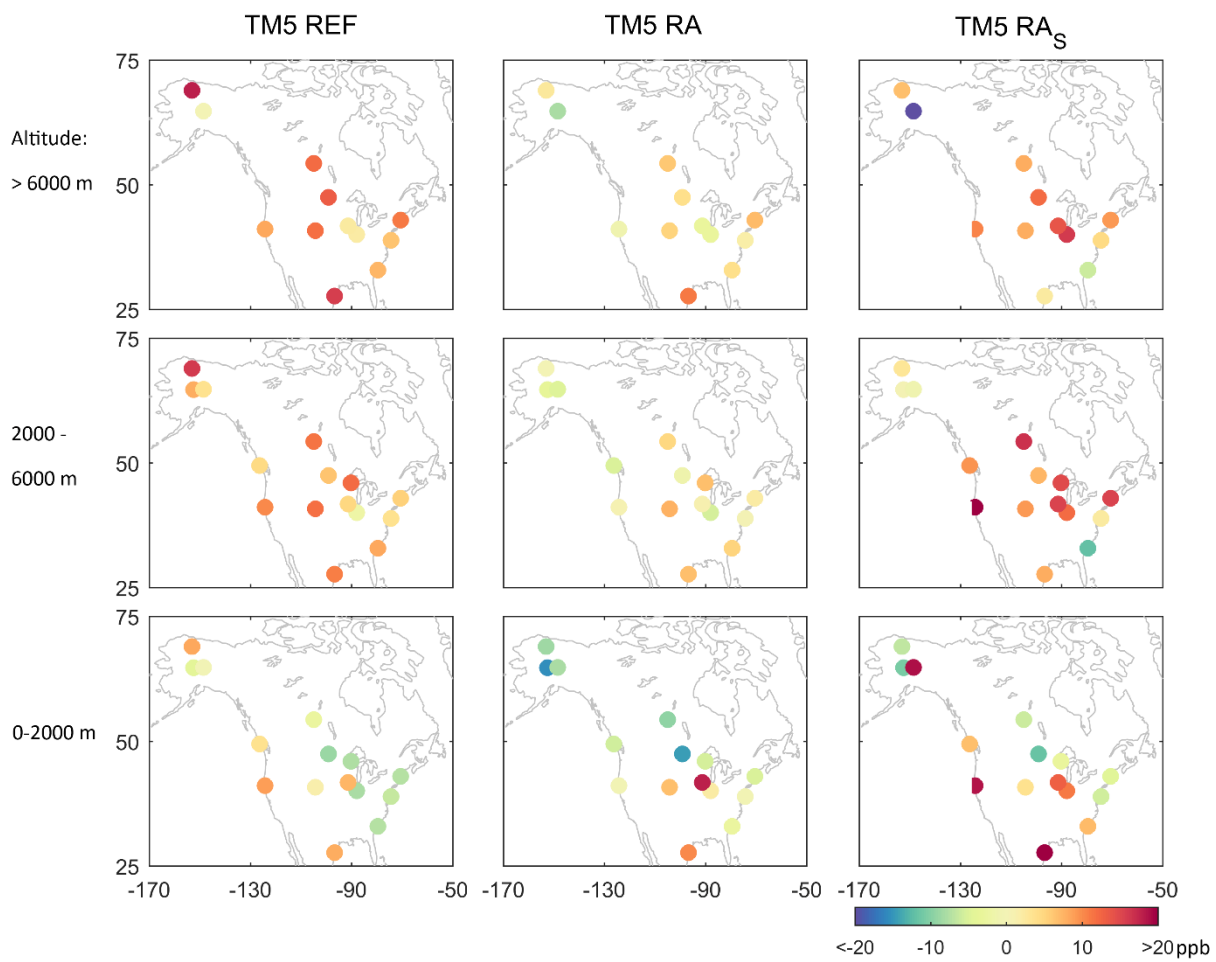

10 **Figure S2 Bias of TM5 modelled methane profiles simulated with a priori fluxes (REF), optimized fluxes based on NOAA surface observations (RA) and optimized fluxes based on NOAA surface observations and GOSAT satellite retrievals (RA<sub>S</sub>).**
